# Supplementary material for: MYH7 p.(Arg1712Gln) is pathogenic founder variant causing hypertrophic cardiomyopathy with overall relatively delayed onset
Source: Neth Heart J. 2023 Jul 24;31(7-8):300–7. doi: 10.1007/s12471-023-01798-9 (PMC10400741; doi:10.1007/s12471-023-01798-9)
Supplement: Supplementary file 1 — Table S1 Dinucleotide repeat markers [file 12471_2023_1798_MOESM1_ESM.xlsx]

## Sheet: Dinucleotide repeat markers
Table S1 Dinucleotide repeat markers
Marker	Repeat start (hg19)	Primer sequence (forward)	Primer sequence (reverse)	Observed allele size range (bp)	Dye	Observed allele number	Expected heterozygosity	Polymorphism information content
261	chr14:			166-196		7	0.7378	0.7079
72	chr14:			246-272		10	0.7992	0.772
1023	chr14:			88-100		7	0.7671	0.7342
1070	chr14:			242-266		7	0.7487	0.7096
1003	chr14:			159-167		5	0.6056	0.5417
50	chr14:			171-179		5	0.7228	0.6763
283	chr14:			119-149		10	0.7965	0.7703
new1	chr14:			181-197		8	0.7983	0.7683
new3	chr14:			272-290		8	0.779	0.7565
972	chr14:			196-206		6	0.7446	0.7033
264	chr14:			212-230		9	0.8206	0.7972
1032	chr14:			262-278		8	0.7409	0.7095
275	chr14:			191-201		5	0.7284	0.679
80	chr14:			128-152		8	0.7945	0.7657
262	chr14:			195-203		5	0.6315	0.5603
